# Supplementary material
Source: Elsevier journal article supplement (https://www.sciencedirect.com/science/article/pii/S002175571930110X)
Supplement: mmc1 [file S002175571930110X:mmc1.docx]

**Supplementary material**

**Figure S1 - Flow chart of the pediatric literature search and study selection.**

n = 156 records identified

through database searching

n = 132 records excluded:

- language other than English
- studies not evaluating FODMAPs diet intervention in children with FGIDs and abdominal pain as the predominant symptom.
- duplicates
- abstracts
- uncontrolled studies

n = 24 potentially relevant records retrieved for scrutiny

n = 14 full-text studies

included in the review

n = 10 reviews/editorials

n = 3 a sorbitol- related studies

n = 3 studies on comprehensive LFM diet

n = 1 fructans-related Study

n = 5* lactose-related studies

n = 7* fructose-related studies

a Including studies evaluating multiple dietary treatments.
